# Supplementary material for: Identification of Anhydrobiosis-related Genes from an Expressed Sequence Tag Database in the Cryptobiotic Midge Polypedilum vanderplanki (Diptera; Chironomidae)
Source: PubMed Central journal article supplement — J Biol Chem. 2010 Sep 10;285(46):35889–99. doi: 10.1074/jbc.M110.150623 (PMC2975212; doi:10.1074/jbc.m110.150623), 2010-09-10
Supplement: supp_M110.150623_Table_S2.pdf [file supp_M110.150623_Table_S2.pdf]

| Gene name          | Accession Number | Primers                | Sequence                                                       | Product size (bp) |
|--------------------|------------------|------------------------|----------------------------------------------------------------|-------------------|
| <i>PvLea1</i>      | AB207255         | LEA1-F<br>LEA1-R       | 5'-tcatgcaaaggacgtcac-3'<br>5'-cttgtcagcagcttgag-3'            | 181               |
| <i>PvTps</i>       | AB490332         | TPS-F<br>TPS-R         | 5'-gaatgagcagattacgtcgtag-3<br>5'-cttgtgtgaatagccgatgta-3'     | 179               |
| <i>PvAqp1</i>      | AB281619         | AQP1-F<br>AQP1-R       | 5'-ctttcggcctcttagcag-3'<br>5'-aacagttggatttaattgagtatgtc-3'   | 164               |
| <i>PvTret1</i>     | AB272983         | TRET1-F<br>TRET1-R     | 5'-ttactctattgacattaggaacattcttt-3'<br>5'-ctgaagctgctgatcctc-3 | 189               |
| <i>PvHbCTT6</i>    | AB513663         | HbCTT6-F<br>HbCTT6-R   | 5'-ctgctgctgctgaacataa-3'<br>5'-tcccttgattgttcgaggt-3'         | 176               |
| <i>PvGlobin2</i>   | AB513664         | GLOB2-F<br>GLOB2-R     | 5'-attaacaataactttgattccaggg-3'<br>5'-attcactcaattgctggc-3'    | 151               |
| <i>PvTrx2</i>      | AB513662         | TRX2-F<br>TRX2-R       | 5'-ccaagtcatgcaatcctg-3'<br>5'-aaattctccaagagtgaaca-3'         | 180               |
| <i>PvDip1</i>      | AB513665         | PvCOIL1-F<br>PvCOIL1-R | 5'-ttatcaacattagcgtgttcgtta-3'<br>5'-tgggattagacatgcctatgg-3'  | 196               |
| <i>PvEf1-alpha</i> | AB490308         | EF1-F<br>EF1-R         | 5'-aactgacaaaccattgcg-3'<br>5'-tcacctggtacagcttct-3'           | 195               |
| <i>PvRpl32</i>     | AB244986         | RPL-F<br>RPL-R         | 5'-cgtcatcagctctgacagata-3'<br>5'-ttgggagcatatgacgagt-3'       | 152               |
