# Supplementary figures and images for: Identification of Anhydrobiosis-related Genes from an Expressed Sequence Tag Database in the Cryptobiotic Midge Polypedilum vanderplanki (Diptera; Chironomidae)
Source: PubMed Central journal article supplement — J Biol Chem. 2010 Sep 10;285(46):35889–99. doi: 10.1074/jbc.M110.150623 (PMC2975212; doi:10.1074/jbc.m110.150623), 2010-09-10

# EST size distribution

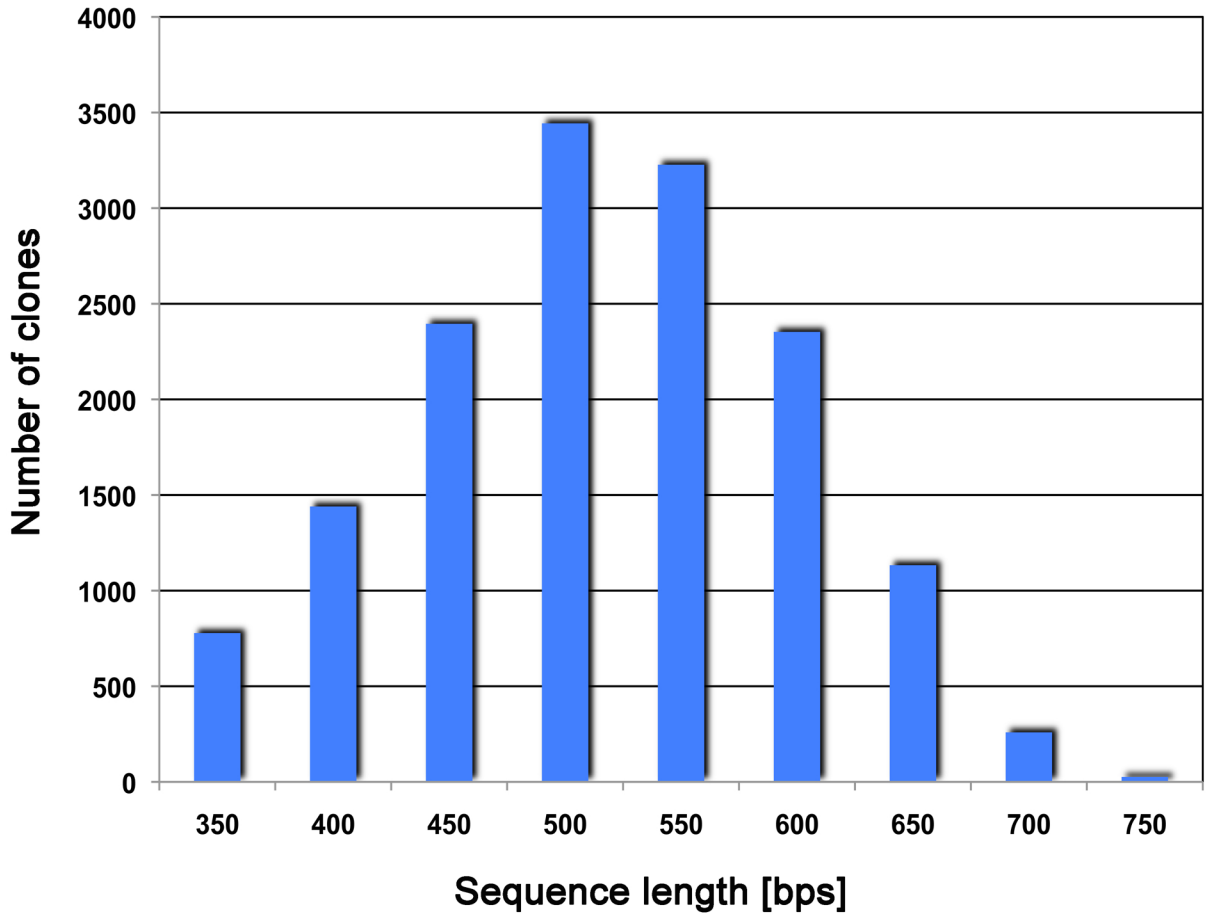

Supplement: supp_M110.150623_Figure_S1.pdf [file supp_M110.150623_Figure_S1.pdf]

**Ribosomal Protein (78) \*\*\***

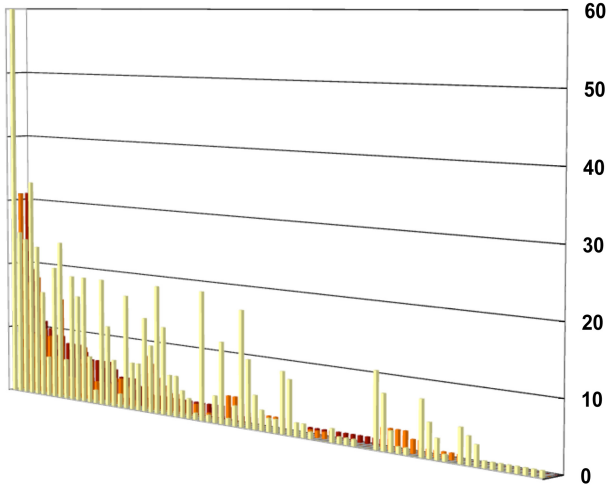

**Actin (36) \***

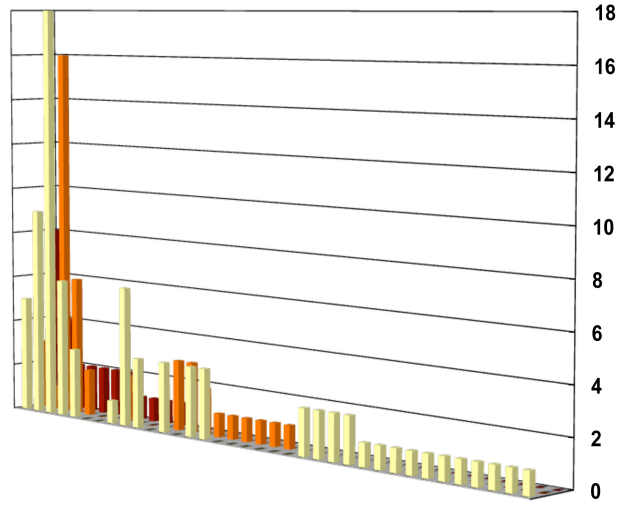

**Globins (64) \*\*\***

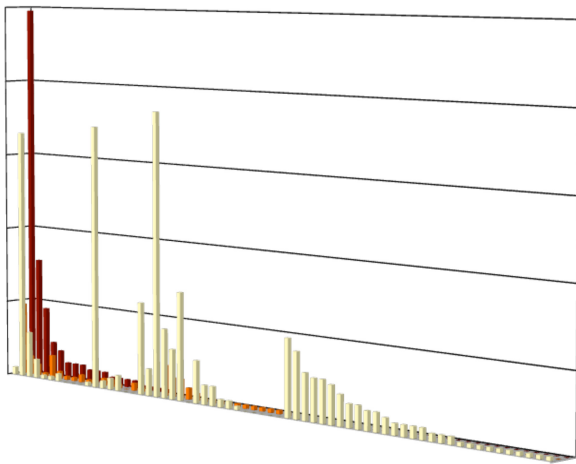

**Cytochrome Oxidase (42) \*\*\***

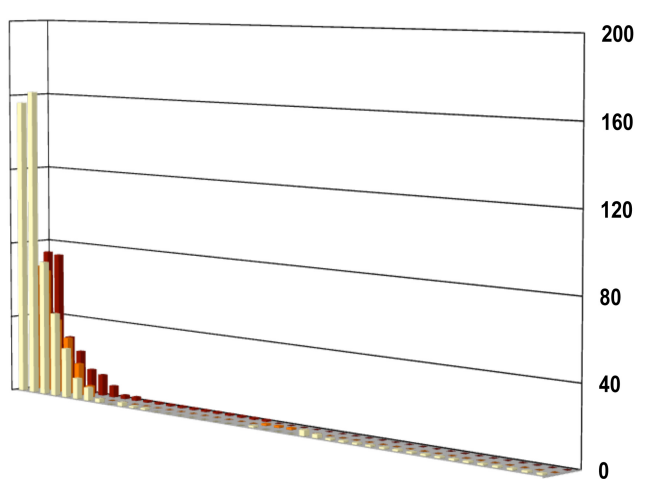

**NADH Dehydrogenase (5)**

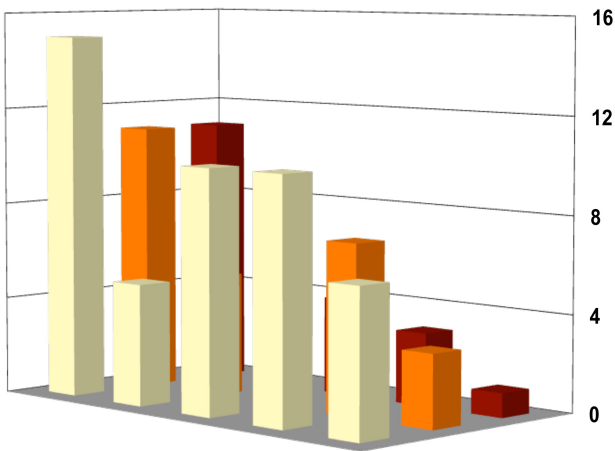

Supplement: supp_M110.150623_Figure_S2.pdf [file supp_M110.150623_Figure_S2.pdf]
